# Supplementary material
Source: Research Square preprint supplement (doi:10.21203/rs.3.rs-8716097/v1)
Supplement: Supplementary file 1 [file 1a91ff0db6c67c050a2b6487.docx]

| **Table 2. Themes and subthemes of real-life experiences related to nutritional management for GC patients** | |
| --- | --- |
| **Theme** | **Subtheme** |
| The conflict between physiological tolerance and nutritional requirements | Eating tolerance disorder and somatic symptoms |
|  | Supplement confusion and tolerance issues |
|  | Behavioral adjustment and coping strategies |
|  | Rehabilitation motivation and functional goals |
|  | Pathological transformation of value orientation |
| Decision paralysis amid knowledge gaps and multi-source conflict | Lack of nutritional knowledge and insufficient health literacy |
|  | Multi-source information and conflicting perspectives |
|  | The double-edged nature of peer support |
| Resource accessibility and affordability constraints | Financial burden and lack of resource accessibility |
|  | Contextual and environmental constraints |
|  | Service and policy expectations |
| Compliance and conflict driven by family relationships | Family responsibilities and self-sacrifice |
|  | Operational guidance and culinary skill requirements |
| The negative cycle of psychological torque and social comparison | Emotional responses and psychological strain |
|  | Social comparison and othering experiences |
|  | Professional support gap and barriers in doctor-patient communication |
