# Supplementary material
Source: Research Square preprint supplement (doi:10.21203/rs.3.rs-8716097/v1)
Supplement: Supplementary file 2 [file 62034915ee9f66be0e622bb1.docx]

| **Table 3. Mapping subthemes to psychological strain theory constructs, potentially modifiable determinants, and supportive-care pathway functions** | | | | |
| --- | --- | --- | --- | --- |
| **Theme / Subtheme** | | **Strain construct** | **Potentially modifiable determinant** | **Pathway function** |
| Theme 1: The conflict between physiological tolerance and nutritional requirements | Eating tolerance disorder and somatic symptoms | Coping strain | Symptom burden creates feasibility constraints that undermine planned nutritional intake. | Symptom-linked nutrition coaching |
| Supplement confusion and tolerance issues | Coping strain | Patients lack clear, actionable guidance to select and adjust supplements when intolerance occurs. | Decision support , symptom coaching |
| Behavioral adjustment and coping strategies | Coping strain | Patients have an insufficient set of practical self-management routines to sustain nutritional behaviors. | Skills training / self-management support |
| Rehabilitation motivation and functional goals | Aspiration strain | Recovery goals exceed current capacity, creating a goal–capacity mismatch that fuels strain and disengagement. | Goal setting , staged plans |
| Pathological transformation of value orientation | Value strain | Conflicting and maladaptive beliefs about eating and nutrition distort value priorities and decision-making. | Values clarification , tailored counseling |
| Theme 2: Decision paralysis amid knowledge gaps and multi-source conflict | Lack of nutritional knowledge and insufficient health literacy | Deprivation strain | Low health literacy limits patients’ ability to convert information into usable nutrition decisions. | Brief education , teach-back |
| Multi-source information and conflicting perspectives | Value strain | Inconsistent information across sources generates decisional conflict and delays action. | Standardized risk communication |
| The double-edged nature of peer support | Coping strain | Unmoderated peer input amplifies uncertainty and distress while reducing confidence in professional guidance. | Guided peer support , media-literacy prompts |
| Financial burden and lack of resource accessibility | Deprivation strain | Affordability barriers and limited service access restrict engagement with nutrition support and products. | Navigation , affordability support |
| Contextual and environmental constraints | Deprivation strain | Logistical constraints in daily life and care settings impede consistent nutrition implementation. | Care coordination , practical supports |
| Service and policy expectations | Aspiration strain | Unmet expectations about services and coverage create frustration and reduce adherence to recommended plans. | Service signposting , policy/referral guidance |
| Theme 4: Compliance and conflict driven by family relationships | Family responsibilities and self-sacrifice | Value strain | Role conflict and guilt-driven self-sacrifice shift priorities away from the patient’s nutritional needs. | Family alignment , role negotiation |
| Operational guidance and culinary skill requirements | Coping strain | Limited meal-preparation skills and operational guidance hinder family implementation of nutrition plans. | Practical skills support , meal planning |
| Theme 5: The negative cycle of psychological strain and social comparison | Emotional responses and psychological strain | Coping strain | Unrecognized or unmanaged distress perpetuates avoidance and destabilizes nutrition adherence. | Distress screening , psychosocial support |
| Social comparison and othering experiences | Aspiration strain | Maladaptive social comparison and perceived othering erode self-efficacy and motivation for nutrition management. | Psychoeducation , peer guidance |
| Professional support gap and barriers in doctor-patient communication | Deprivation strain | Limited timely professional support and communication barriers prevent effective problem-solving and follow-through. | Communication support , follow-up navigation |
