# Supplementary material
Source: Research Square preprint supplement (doi:10.21203/rs.3.rs-8716097/v1)
Supplement: Supplementary file 3 [file 75aa528634dd7f743d3c8d3f.docx]

| **Table 1. Demographic and clinical characteristics of study participants (n=15)** | | | | |
| --- | --- | --- | --- | --- |
| **Code** | **Age** | **Gender** | **Education** | **Employment** |
| A | 55 | Male | Primary | Farmer |
| B | 65 | Female | Junior | Farmer |
| C | 49 | Male | Junior | Unemployed |
| D | 56 | Male | Senior | Unemployed |
| E | 63 | Female | Primary | Farmer |
| F | 38 | Male | Bachelor | Teacher |
| G | 71 | Male | Junior | Farmer |
| H | 64 | Female | Primary | Farmer |
| I | 52 | Male | Associate | Clerk |
| J | 32 | Female | Senior | Unemployed |
| K | 66 | Male | Primary | Farmer |
| L | 64 | Male | Senior | Unemployed |
| M | 68 | Female | Junior | Unemployed |
| N | 56 | Male | Associate | Unemployed |
| O | 68 | Female | Primary | Farmer |
